1 **DBS for substance use disorders? An exploratory qualitative study of perspectives of people currently in**  
2 **treatment**

3  
4 **Erika Versalovic<sup>1,2</sup>, Eran Klein<sup>1,2,3</sup>, Sara Goering<sup>1,2</sup>, Quyen Ngo<sup>4</sup>, Kate Gliske<sup>4</sup>, Marion Boulicault<sup>5</sup>, Laura**  
5 **Specker Sullivan<sup>6</sup>, Mark J Thomas<sup>7,8</sup>, Alik S Widge<sup>8,9</sup>**

6 <sup>1</sup>Department of Philosophy, University of Washington

7 <sup>2</sup>Center for Neurotechnology, University of Washington

8 <sup>3</sup>Department of Neurology, Oregon Health & Science University School of Medicine <sup>4</sup>Butler Center for  
9 Research, Hazelden Betty Ford Foundation

10 <sup>5</sup>College of Computing, Massachusetts Institute of Technology

11 <sup>6</sup>Department of Philosophy, Fordham University

12 <sup>7</sup>Department of Neuroscience, University of Minnesota

13 <sup>8</sup>Medical Discovery Team on Addiction, University of Minnesota

14 <sup>9</sup>Department of Psychiatry & Behavioral Sciences, University of Minnesota

15 **ABSTRACT:**

16 **Objective:** While previous studies have discussed the promise of deep brain stimulation (DBS) as a possible  
17 treatment for substance use disorders (SUDs) and collected researcher perspectives on possible ethical issues  
18 surrounding it, none have consulted those with SUDs themselves. We addressed this gap by interviewing those with  
19 SUDs.

20 **Methods:** Participants viewed a short video introducing DBS, followed by a 1.5 hour semi-structured interview on  
21 their experiences with SUDs and their perspective on DBS as a possible treatment option. Interviews were analyzed  
22 by multiple coders who iteratively identified salient themes.

23 **Results:** We interviewed 20 people in 12-step based, inpatient treatment programs (10 [50%] white/Caucasian, 7  
24 Black/African American [35%], 2 Asian [10%], 1 Hispanic/Latino [5%], and 1 [5%] Alaska Native/American  
25 Indian; 11 [45%] women). Interviewees described a variety of barriers they currently faced through the course of  
26 their disease that mirrored barriers often associated with DBS (stigma, invasiveness, maintenance burdens, privacy  
27 risks) and thus made them more open to the possibility of DBS as a future treatment option.

28 **Conclusions:** Individuals with SUDs gave relatively less weight to surgical risks and clinical burdens associated  
29 with DBS than previous surveys of provider attitudes anticipated. These differences derived largely from their  
30 experiences living with an often-fatal disease and encountering limitations of current treatment options. These  
31 findings support the study of DBS as a treatment option for SUDs, with extensive input from people with SUDs and  
32 advocates.

33 **KEYWORDS:** deep brain stimulation/DBS, substance use disorders/SUD, qualitative, neural technology,  
34 neuroethics

35

## Qualitative Study on DBS for SUDs

### 36 **INTRODUCTION**

37           Deep brain stimulation (DBS) is a rapidly expanding treatment option for a wide range of conditions,  
38 including Parkinson's disease, obsessive-compulsive disorder, and epilepsy. DBS is currently being explored as a  
39 possible treatment for substance use disorders (SUDs) (Wang et al. 2018). Case reports of experimental DBS in  
40 SUDs describe notable improvements (Qu et al. 2019; Gonçalves-Ferreira et al. 2016; Muller et al. 2013). Despite  
41 promising results from these small samples, enthusiasm has been tempered by concerns from researchers and  
42 bioethicists that it may be difficult to study DBS for SUD without coercion (Pisapia et al. 2017). SUDs are socially  
43 stigmatized and often criminalized, increasing the risk of people being pressured to pursue treatments to avoid  
44 prosecution. It is also unclear whether individuals would accept a physically invasive neurosurgical intervention for  
45 SUDs. Past research has argued that SUDs are fundamentally less disabling or dangerous than other DBS indications  
46 (Ali et al. 2016; Lee et al. 2016).

47           That cautious position may not adequately reflect the widespread and severe nature of SUDs, and the  
48 limitations of current treatment (Mojtabai et al. 2019, Substance Abuse and Mental Health 2020). While inpatient  
49 treatment can help people with SUDs achieve initial abstinence, the rate of relapse is high (Andersson et al. 2019;  
50 Gil-Rivas et al. 2009). Agonist therapies are primarily indicated for opioid use disorders, and are often difficult to  
51 access. Many of these limitations reflect social stigma and under-investment, and no technology can substitute for  
52 the policy solutions needed to reverse structural inequalities. That said, even when patients can access treatment, a  
53 substantial fraction cannot recover through existing options alone. For those patients, DBS may be more attractive to  
54 people living with SUDs than researchers imagine. Indeed, research target population preferences may differ  
55 significantly from researcher or clinician perspectives (e.g. Anderson 2004). Consultation with potential or actual  
56 device users can reveal novel considerations about neurotechnology development that can help guide future research  
57 (Goering & Klein 2020; Collinger et al. 2013).

58           Here, we report a qualitative study that explored the values, interests and concerns of people with SUDs in  
59 relation to the prospect of DBS as a treatment option. We interviewed people in treatment centers in the early  
60 abstinence phase of their SUDs, asking about participants' experiences with their disorder and treatment, and their  
61 perspectives on DBS across five themes: personal agency, social dynamics, stigma, privacy, and interactions with  
62 the healthcare system. These aspects reveal how some common concerns surrounding DBS (e.g., physical

## Qualitative Study on DBS for SUDs

63 invasiveness and maintenance burdens) compare to the burdens already experienced through the course of SUDs and  
64 their treatment.

65

66

### 67 **METHODS**

68 We conducted 20 semi-structured interviews with people in residential treatment for SUDs. Interview  
69 guides were developed collaboratively through a series of discussions among all authors, building on previous work  
70 related to neurotechnologies (Versalovic et al. 2020, Goering et al. 2017, Klein et al. 2016) and with attention to the  
71 circumstances of people in treatment for SUDs. Purposive sampling methods were used for representation of a range  
72 of substances, and of racial groups often excluded from medical device research (Fox-Rawlings et al. 2018).  
73 Participants were recruited through the [anonymized for review] treatment system. The study was reviewed by the  
74 [anonymized for review] (STUDY00009975) and [anonymized for review]. Procedures were followed in accordance  
75 with both institutional review boards and with the Helsinki Declaration (as revised in 2004) (WMA Declaration of  
76 Helsinki).

77 Participants were initially asked about their experiences with addiction and treatment. They then watched a  
78 five-minute video produced by the study team introducing deep brain stimulation (DBS) (see supplemental  
79 materials). The interview guide (see supplemental materials) was structured around ethical and social concerns that  
80 have arisen in the application of DBS to mental health disorders to explore their saliency within the SUD population.  
81 These themes included agency (ex: how could you imagine a DBS enhancing or undermining a user's sense of  
82 agency?), social relationships (ex: would you involve loved ones in the process of getting a DBS?), stigma (ex: how  
83 could possible stigma of a neural device interact with stigma surrounding SUDs?), privacy (ex: who should have  
84 access to neural data?), and interactions with the healthcare system (ex: what kind of support is needed for follow-up  
85 appointments?). At the end of the interview, participants were asked if DBS would be something they might  
86 consider if it became available, who they identified as the most appropriate target users (if any), the value of  
87 gathering target-user perspectives, and whether they wished to amend any of their responses.

88 Interviews were conducted and recorded through HIPAA-compliant Zoom by EK and EV and lasted 1.5  
89 hours on average. Demographic surveys were administered online post-interview. Participants were compensated  
90 \$25 through a gift card. Interviews were transcribed using an online service. SG, EK, and EV read the interviews

## Qualitative Study on DBS for SUDs

91 and conducted thematic content analysis. The first 12 transcripts were each independently, inductively coded on  
92 atlas.ti, followed by discussions to reconcile code differences to arrive at the final coding scheme. The final 8 were  
93 coded by EV. To ensure sensitivity to the lived experience of SUDs and the treatment process, we used a team-based  
94 approach (Giesen and Roeser 2020) with monthly meetings of the full authorial team, including our SUDs subject  
95 matter experts, to check in, discuss any difficulties, and make decisions about the research process (e.g., timeline,  
96 determining coding schemes, broadening recruitment, etc.). Data were collected from September 2020 to May 2021  
97 and analyzed from May 2021 to December 2021. Methods reported here are in line with the COREQ (Tong et al.  
98 2007) and RATS (Clark 2003) checklists (Neale & West 2015).

99

100

## 101 **RESULTS**

102

### 103 **Demographics**

104 Participant demographics and specifics regarding primary substance, prior treatment, co-occurring disorders, and  
105 family history are presented in Table 1. There was nearly equal representation of female and male participants (11:9  
106 respectively). Ten of the 20 participants were white, with seven identifying as Black/African American, two as  
107 Asian, one as American Indian/Alaska Native, and one as Hispanic/Latino. There was a spread across ages 25-64  
108 and in education level from some high school to completion of a graduate degree. Participants had backgrounds in a  
109 wide range of substances: alcohol being the most prominent (90%), with just under a third identifying marijuana  
110 (30%) and with two to three of participants identifying each of the categories of opioids, cocaine, and  
111 methamphetamines. 17 of the 20 participants had a family history of SUDs.

112

### 113 **Findings**

114 *Initial Reaction to DBS: Unfamiliar and apprehensive, yet interested.*

115 Most participants initially expressed unease regarding the physically invasive nature of DBS (i.e., requiring  
116 surgery). While two participants had heard of DBS before, none were familiar with how it worked or its current  
117 applications. First impressions often described DBS as ‘weird’ and ‘scary’: “wow, it’s crazy, because going deep  
118 inside the brain is something that you can’t really play with” (H12) and “Unlike taking an oral pill or taking a shot,

## Qualitative Study on DBS for SUDs

119 it's invasive. To be honest, that's a little scary" (H14). Despite that initial unease, when prompted at the conclusion  
120 of the interview as to whether or not DBS was something they would ever personally consider, only one participant  
121 said no outright: "it reminds me of shock therapy ... Oh God. I don't want something in my head" (H6).

122 The majority of participants expressed interest, but differed in their perceptions of when DBS would be a  
123 reasonable option. Some expressed hesitancy about the exploratory nature of research: "If there's incentive, yeah I'd  
124 do it. But this is research. So it's dangerous. I'm a little scared" (H20). Many described seeing DBS as a "last resort,"  
125 but there was high variation in where people identified that threshold. Some described being open only if they had  
126 exhausted all other existing treatment options, while others said they could see themselves reaching last resort  
127 desperation with a single relapse: "if I relapse one more time then yeah, I'm all for it" (H16). Others saw themselves  
128 as early adopters: "I would definitely raise my hand to say, 'Hey, let me jump on ship'" (H12).

129

### 130 *Perspectives on Living with Substance Use Disorder, Treatment, and DBS*

131 Participants described their experiences living with SUDs and in treatment, and how these experiences  
132 shaped their perspectives on the prospect of DBS.

133

### 134 *Living with a Substance Use Disorder (Table 2).*

135 A common theme was that addiction is difficult to overcome and, all too often, fatal. Participants felt a loss  
136 of control and at the mercy of their cravings. One participant likened their disorder to a "puppet master" making  
137 them do things they could not stop. Participants reported family histories of substance use that often involved  
138 recurrent relapse, family trauma, and death.

139 Participants recounted struggling with shame about ways their SUDs had harmed loved ones. They felt  
140 judged by family members and work colleagues. Nearly all had experienced stigma (e.g. SUD understood as a  
141 matter of willpower or indicative of moral failure). Most participants struggled to maintain relationships and  
142 reported isolating themselves to hide their substance use and avoid stigma. While some participants described how  
143 they were before the SUD, many claimed being an "addict" as part of their identity. They shared struggles with self-  
144 trust and guilt about manipulating others when the "addict" part of themselves was operative. In addition to the  
145 social costs of SUDs, participants described financial and emotional costs, often with negative consequences for  
146 personal and work relationships, financial resources, and self-esteem.

## Qualitative Study on DBS for SUDs

147

148 *Perspectives on SUD Treatment (Table 3).*

149 Participants' sentiments about their treatment and prospect of recovery were often marked by uncertainty,  
150 desperation, and determination as they reflected on how much they had lost to their SUD. Some were skeptical of  
151 their own ability to recover, given that they had watched peers struggle and relapse. A common concern was  
152 uncertainty related to the unpredictability of cravings: "Honestly, I feel like, once I complete treatment, if I were to  
153 have a bad enough day, I could potentially say just screw it and go get a drink and snowball back to where I was or  
154 even worse" (H19). Nearly all participants viewed SUDs as a long-term disease and recognized their recovery as  
155 fragile. As one participant put it, "12 steps is lifelong. It's forever" (H20). Participants often shared lessons from  
156 their 12-step based programs: the need to rely on others, recognition that they could not maintain abstinence alone,  
157 and that even with support, they still have to "do the work" to maintain abstinence. Many also mentioned the  
158 importance of surrendering to a higher power.

159 Unprompted, five participants expressed concerns regarding limited treatment options for SUDs. Some had  
160 negative experiences with existing treatments (e.g., anti-craving medications with side effects). Financial costs of  
161 treatment and the difficulties of finding time in busy schedules were described as burdensome. Participants  
162 expressed openness to a variety of methods to achieve recovery, often using the metaphor of "tools in the toolbox"  
163 to describe this multi-faceted approach.

164 While many participants emphasized the importance of understanding and minimizing cravings as a  
165 recovery goal, even more participants named building social community and repairing relationships as key recovery  
166 aims: "It's the isolation part of it. It's crazy because you hear that the opposite of addiction isn't sobriety. The  
167 opposite of addiction is connection. It blows my mind how true that is" (H7). A majority of participants also  
168 expressed the desire to gain self-understanding and learn how to better process emotions.

169

170 *Perspectives on Deep Brain Stimulation (Table 4).*

171 Participants expressed concerns regarding DBS risks such as surgical complications. These were often  
172 balanced against existing concerns regarding the high risks of relapse and a desire to aggressively avoid that  
173 possibility. Many participants saw overcoming cravings as the hardest obstacle to recovery and were drawn to the  
174 possibility of DBS to help quiet cravings and understand their patterns: "I am hopeful to get over these cravings

## Qualitative Study on DBS for SUDs

175 eventually to regain control, to find out more about the causes of why I'm like this, kind of like putting myself out  
176 there to myself" (H13). Participants who had co-occurring disorders, some of which might also be treatable with  
177 DBS, expressed increased interest in DBS if it could simultaneously help them with their depression or OCD.

178 Some participants noted how DBS did not seem drastically different from anti-craving medications, and  
179 might even be better: "Honestly the DBS kind of sounds more concrete or reassuring than, because I can have a bad  
180 day and just say screw it and not take the pill and then succumb to my craving, whereas I can't just take that out of  
181 my head" (H19). Others found the physical invasiveness potentially off-putting. A couple participants expressed an  
182 openness to potentially using the device, but only temporarily, implying that continued reliance on it might be  
183 worrisome: "Getting all-natural is definitely the end goal, for sure, but if I need something to kickstart it, all else has  
184 failed, so I'm not opposed to it" (11).

185 Participants viewed the possibility of DBS-related stigma as real, but potentially less concerning than  
186 stigma related to other SUD treatment. "I don't know why they would view me any differently with one of the  
187 devices or taking pills. I would say the pros for this device would be, there's no bottles in my bathroom" (H5).  
188 Others expressed that concern regarding the stigma associated with the visibility of the device – scarring, visible  
189 wires or battery packs – was lessened due to how visible their disorder had already been to those around them and  
190 would be likely counterbalanced by potential benefits.

191 Nearly all the participants spontaneously mentioned the idea of DBS being another tool in their recovery  
192 toolbox. They envisioned DBS as working in tandem with other recovery support systems rather than as a singularly  
193 curative intervention. Instead of worrying about the stigma of having a device, for instance, one participant  
194 recommended "Being completely upfront with people, saying like, 'This is simply just a tool as is all of these 12  
195 steps.' If that's 12 tools that you have in the 12 steps, this is just my 13th tool that kind of gives me a little bit more  
196 help" (H1).

197 Participants recognized that a neural device that records information could be viewed as a kind of  
198 surveillance. Some participants jokingly referenced conspiracy theories about implanted chips and trackers, even as  
199 they acknowledged the potential value of allowing health care professionals, and sometimes family members, access  
200 to DBS data. Other participants raised concerns about sharing that information, however, even with close family  
201 members. Distrust in law enforcement led to most participants not wanting law enforcement officers to ever have  
202 access to neural data. Conversely, one participant with experience wearing an alcohol monitoring bracelet had a



## Qualitative Study on DBS for SUDs

203 positive experience with the bracelet being a helpful accountability mechanism, and thought DBS data might serve a  
204 similar role.

205 Some participants were concerned about the financial and time burdens of anticipated DBS programming  
206 appointments. Others, however, noted that opioid agonist treatments already often require regular check-ins and the  
207 associated burdens of appointments, monitoring, and time off from work. Similarly, participants who worked with  
208 therapists were already used to making space in their schedules for regular appointments, and found the regular  
209 contact helpful for personal accountability and health maintenance.

210

211 *The importance of patient perspectives for technology development (Table 5)*

212 Reflecting on the interviews themselves, most participants saw them as critical for informing the research  
213 process by incorporating perspectives derived from personal experience. Some participants also noted the  
214 importance of collecting a wide range of perspectives from people with SUDs, to prevent over-generalization. Other  
215 participants framed them as serving an important outreach function of helping inform people with SUDs about the  
216 prospect of DBS.

217

## 218 **DISCUSSION**

219 Our results provide evidence that people in treatment for SUDs are open to the possibility of DBS, despite  
220 initial apprehensions regarding its physical invasiveness and novelty. This openness often arose from the difficulties  
221 and high burdens participants had faced from their SUDs, and their frustrations with access to and effectiveness of  
222 existing treatment options. These responses diverged from prior studies of clinicians and researchers that advocate  
223 for more restrictive “last resort” criteria (Ali et al. 2016; Lee et al. 2016). Participants viewed SUDs as serious  
224 diseases that need better treatment options. In the context of this prior experience, they often considered the risks of  
225 DBS well balanced against the potential benefits.

226 Our findings emphasize that though DBS may be novel, the considerations it raises surrounding agency,  
227 stigma, privacy, and accessibility are not. Participants’ experiences of feeling at the mercy of their cravings led them  
228 to be interested in the possibility of DBS helping quiet those urges. Their experiences with the stigma that often  
229 surrounds SUD treatment led them to feeling less concerned around the potential stigma of a visually noticeable



## Qualitative Study on DBS for SUDs

230 neural device. Device maintenance appointment burdens were often not viewed as a potential barrier, due to  
231 participants' familiarity with frequent therapy and medical appointments and the 12-step emphasis on needing to "do  
232 the work" that recovery requires. DBS was seen as "another tool in the toolbox" that might ease the intensity of  
233 cravings, but could never do the complex and expansive work that recovery often requires. Previous work on  
234 prospective user acceptability proposes that the degree to which an intervention is considered appropriate depends  
235 on the perceived burden, opportunity costs, and ethicality (degree to which it aligns with the user's value system)  
236 (Sekhon et al. 2017). Our findings affirm the relevance of these considerations, and offer additional insight to the  
237 way models of acceptability should consider these aspects *relative to* the pre-existing treatment landscape (e.g.  
238 opportunity costs of in-patient treatment, 12-step emphasizing "you can't do it alone").

239         These findings also show the importance of consulting those who have the targeted disorder in order to  
240 better understand the ethical issues surrounding novel interventions like DBS. Contra Carter et al. (2011), we found  
241 that people in SUD treatment, regardless of if for alcohol or opioids, view addiction as "deadly" and available  
242 addiction treatments (e.g., anti-craving medications) as either ineffective or causing undesired side effects. Many  
243 participants are living with co-occurring disorders that have been proposed as clinical trial exclusions (Ali et al.  
244 2016). Given that many people in our study and the broader SUD population have co-occurring disorders (Han et al.  
245 2017), these exclusions should be reconsidered. The potential reduction of confounding study variables may not be  
246 justified if it makes the data inapplicable to the majority of people with severe SUDs (Compton et al. 2007). Indeed,  
247 people who are in SUD treatment refractory with frequent relapses may be more likely to live with co-occurring  
248 disorders (Najt et al. 2011; Bradizza et al. 2006). There is also reason to expect dual benefit; the most studied DBS  
249 target for SUDs (the nucleus accumbens and surrounding white matter) also relieves depressive and anxious  
250 symptoms (Sullivan et al. 2021; Widge et al. 2018).

251         Two additional considerations are highlighted by this study: (1) the importance of increased sensitivity to  
252 family dynamics that may complexify caregiver considerations, and (2) the need for increased data protections to  
253 prevent further criminalization of SUDs. Participants often named stronger boundary building with loved ones and  
254 community rebuilding as goals for recovery. For some, this meant cutting off familial ties and carefully building a  
255 new sense of family. Trials of DBS for psychiatric disorders often expect participants to have at least one family  
256 member involved with their care and to provide support (Widge & Dougherty 2022). Thus, heightened attention to  
257 family dynamics in SUD populations will be needed in clinical trial design.

## Qualitative Study on DBS for SUDs

258           Secondly, people with SUDs often experience limitations on and threats to privacy due to the degree of  
259 criminalization and stigma of SUDs (Kleinman & Morris 2021; AWHONN Position). Limitations on privacy occur,  
260 for instance, at the intersection of SUDs and the criminal justice system (e.g., drug monitoring) (Polles et al. 2021;  
261 Chang 2020). While much of the discussion of privacy in the context of novel neurotechnology, like DBS, has  
262 focused on data security (Bonaci et al. 2014), data ownership (Naufel & Klein 2020), or agency (Schönau et al.  
263 2021), our findings suggest that privacy related to the DBS and the criminal justice system is an underappreciated  
264 concern for SUDs specifically. The majority of participants said that law enforcement should never have access to  
265 neural data. Both issues require careful consideration should DBS go to clinical trials.

266           Our study has limitations. Participants were drawn from two clinics within the same treatment system and,  
267 notably, all expressed positive experiences with their current treatment program. This experience could have led to  
268 more positive appraisals of the potential of DBS, and research more broadly. Further, though we extended  
269 recruitment to achieve higher racial diversity, we undersampled many minoritized perspectives, particularly those  
270 who hold Asian, Native American, Latino, and Queer identities. Finally, discussion surrounding DBS remained  
271 theoretical; no participants had direct experience with the technology, which could have led to stronger framing  
272 effects from the video and interview questions. As such, we echo others' calls for future work to address these  
273 perspective gaps (Goering et al. 2022, Wexler & Specker-Sullivan 2021; Shen 2020).

274           Ultimately, our study shows the importance of understanding novel therapies in the context of the specific  
275 features of a disorder, how it is experienced by people who are differently socially positioned, what their treatment  
276 options are, and how treatment affects their perspectives on themselves. Addressing the challenges of SUDs will  
277 require a multi-pronged approach that makes use of a variety of intervention and support strategies. Participants'  
278 openness to DBS as one "tool in the toolbox" for SUD treatment is notable, but should be considered against the  
279 backdrop of substantially unequal access to existing forms of treatment and support, and pressing social problems  
280 that contribute to and exacerbate the experience of SUDs. DBS may be able to help some people make significant  
281 strides in their recovery, but it cannot address all the broader challenges those with SUDs face in our current social  
282 context.

Qualitative Study on DBS for SUDs

283 **ACKNOWLEDGEMENTS:** We thank Ms. Christi Sullivan for filming and editing the DBS briefing video,  
284 [anonymized for review] Adam Erdman for helping with interview logistics, and all of our participants who  
285 generously offered their time and shared their personal experiences with SUDs and their treatment.

286

Qualitative Study on DBS for SUDs

287

References

288  
289  
290

Ali R, DiFrancesco MF, Ho AL, Kampman KM, Caplan AL, & Halpern CH. (2016). Attitudes Toward Treating Addiction With Deep Brain Stimulation. *Brain Stimulation*, 9, 466-468. doi: 10.1016/j.brs.2016.03.009

291  
292  
293

Andersson HW, Wenaas M, Nordfjærn T. (2019). Relapse after inpatient substance use treatment: A prospective cohort study among users of illicit substances. *Addict Behav*, 90:222-228. doi: 10.1016/j.addbeh.2018.11.008

294  
295

Anderson, K. (2004). Targeting Recovery: Priorities of the Spinal Cord-Injured Population. *Journal of Neurotrauma*, 21(10): 1371–1383.

296  
297

AWHONN Position Statement. (2015). Criminalization of Pregnant Women with Substance Use Disorders. *Journal of Obstetric, Gynecologic, & Neonatal Nursing*, 44:155-157. doi: 10.1111/1552-6909.12531

298  
299  
300

Bonaci T, Calo R, and Chizeck HJ. (2014). "App stores for the brain: Privacy & security in Brain-Computer Interfaces," *2014 IEEE International Symposium on Ethics in Science, Technology and Engineering*, 1-7. doi: 10.1109/ETHICS.2014.6893415

301  
302  
303

Bradizza CM, Stasiewicz PR, & Paas ND. (2006). Relapse to alcohol and drug use among individuals diagnosed with co-occurring mental health and substance use disorders: a review. *Clinical psychology review*, 26(2), 162–178. doi: 10.1016/j.cpr.2005.11.005

304  
305

Carter A, & Hall W. (2011). Ethical Issues Raised by Proposals to Treat Addiction Using Deep Brain Stimulation. *Neuroethics*, 4(2), 129-142. doi: 10.1007/s12152-010-9091-3

306  
307

Chang G. (2020). Maternal substance use: consequences, identification, and interventions. *Alcohol Research: Current Reviews*, 40(2). doi: 10.35946/arcr.v40.2.06

308  
309

Clark JP. (2003). How to peer review a qualitative manuscript. In *Peer Review Health Sciences*. Second edition. Edited by Godlee F, Jefferson T. London: BMJ Books; 219–235.

310  
311  
312  
313

Compton WM, Thomas YF, Stinson FS, Grant BF. (2007). Prevalence, correlates, disability, and comorbidity of DSM-IV drug abuse and dependence in the United States: results from the national epidemiologic survey on alcohol and related conditions. *Arch Gen Psychiatry*. 64(5):566-76. doi: 10.1001/archpsyc.64.5.566. PMID: 17485608.

314  
315  
316

Klein E, Goering S, Gagne J, Shea CV, Franklin R, Zorowitz S, Dougherty D & Widge AS. (2016). Brain-computer interface-based control of closed-loop brain stimulation: attitudes and ethical considerations. *Brain-Computer Interfaces*, DOI: 10.1080/2326263X.2016.1207497

317  
318  
319

Fox-Rawlings SR, Gottschalk LB, Doamekpor LA, Zuckerman DM. (2018). Diversity in Medical Device Clinical Trials: Do We Know What Works for Which Patients? *Milbank Q*. 96(3):499-529. doi: 10.1111/1468-0009.12344. PMID: 30203600; PMCID: PMC6131322.

320  
321  
322

Gil-Rivas V, Prause J, Grella CE. (2009). Substance use after residential treatment among individuals with co-occurring disorders: the role of anxiety/depressive symptoms and trauma exposure. *Psychol Addict Behav*, 23(2):303-314. doi:10.1037/a0015355

323  
324

Goering S, Brown TE, McCusker D, Montes N, Schönau A, Versalovic E, Klein E. (2022). Integrating Equity Work throughout Bioethics. *Am J Bioeth*, 22(1):26-27. doi: 10.1080/15265161.2021.2001108

325  
326

Gonçalves-Ferreira A, do Couto FS, Rainha Campos A, Lucas Neto LP, Gonçalves-Ferreira D, Teixeira J. (2016). Deep Brain Stimulation for Refractory Cocaine Dependence. *Biological Psychiatry*, 79(11):e87–9.

327  
328  
329

Han B, Compton WM, Blanco C, Colpe LJ. (2017). Prevalence, Treatment, And Unmet Treatment Needs Of US Adults With Mental Health And Substance Use Disorders. *Health Aff*. 36(10):1739-1747. doi: 10.1377/hlthaff.2017.0584

330  
331

Kleinman RA, & Morris NP. (2021). Rethinking the Criminalization of Personal Substance Use and Possession. *J GEN INTERN MED*, doi: 10.1007/s11606-021-06628-5

## Qualitative Study on DBS for SUDs

- 332 Lee KE, Bhati MT, & Halpern CH. (2016). A Commentary on Attitudes Towards Deep Brain Stimulation  
333 for Addiction. *J Neurol Neuromedicine*, 1(8), 1-3.
- 334 Mojtabai R, Mauro C, Wall MM, Barry CL, Olfson M. (2019). Medication Treatment For Opioid Use  
335 Disorders In Substance Use Treatment Facilities. *Health Aff*. 38(1):14-23. doi: 10.1377/hlthaff.2018.05162
- 336 Müller UJ, Voges J, Steiner J, Galazky I, Heinze H-J, Möller M, Pisapia J, Halpern C, Caplan A, Bogerts  
337 B, Kuhn J. (2013). Deep brain stimulation of the nucleus accumbens for the treatment of addiction. *Annals  
338 of the New York Academy of Sciences*, 1282(1):119–28.
- 339 Najt P, Fusar-Poli P, & Brambilla P. (2011). Co-occurring mental and substance abuse disorders: a review  
340 on the potential predictors and clinical outcomes. *Psychiatry research*, 186(2-3), 159–164. doi:  
341 10.1016/j.psychres.2010.07.042
- 342 Naufel S, Klein E. (2020). Brain-computer interface (BCI) researcher perspectives on neural data  
343 ownership and privacy. *J Neural Eng*, 17(1):016039. doi: 10.1088/1741-2552/ab5b7f
- 344 Neale J, & West R. (2015). Guidance for reporting qualitative manuscripts [Editorial]. *Addiction*, 110(4),  
345 549–550. <https://doi.org/10.1111/add.12857>
- 346 Pisapia JM, Halpern CH, Muller UJ, Vinai P, Wolf JA, Whiting DM, Wadden TA, Baltuch GH, Caplan  
347 AL. (2013). Ethical Considerations in Deep Brain Stimulation for the Treatment of Addiction and  
348 Overeating Associated With Obesity. *AJOB Neurosci*, 4(2):35-46. doi:10.1080/21507740.2013.770420
- 349 Polles A, Christopher B, Jacobs W, Merlo LJ. (2021). Adaptations to substance use disorder monitoring by  
350 physician health programs in response to COVID-19. *Journal of Substance Abuse Treatment*, 125. doi:  
351 10.1016/j.jsat.2021.108281
- 352 Qu L, Ge S, Li N, Wang W, Yang K, Wu P, Wang X, Shi J. (2019). Clinical evaluation of deep brain  
353 stimulation of nucleus accumbens/anterior limb of internal capsule for opioid relapse prevention: protocol  
354 of a multicentre, prospective and double-blinded study. *BMJ Open*, 9:e023516. doi: 10.1136/bmjopen-  
355 2018-023516
- 356 Sekhon M, Cartwright M, & Francis JJ. (2017). Acceptability of healthcare interventions: an overview of  
357 reviews and development of a theoretical framework. *BMC Health Services Research*, 17:88. doi:  
358 10.1186/s12913-017-2031-8
- 359 Shen FX. (2020). Racial Injustice and Neuroethics: Time for Action. *AJOB Neuroscience*, 11(3);212-216.  
360 doi: 10.1080/21507740.2020.1778133
- 361 Sullivan CRP, Olsen S, Widge AS. (2021). Deep brain stimulation for psychiatric disorders: From focal  
362 brain targets to cognitive networks. *NeuroImage*. 225:117515.
- 363 Tong A, Sainsbury P, & Craig J. (2007). Consolidated criteria for reporting qualitative research (COREQ):  
364 a 32-item checklist for interviews and focus groups. *International journal for quality in health care :  
365 journal of the International Society for Quality in Health Care*, 19(6), 349–357. doi:  
366 10.1093/intqhc/mzm042
- 367 Versalovic E, & Klein E. (2020). "Who Will I Be?": Relational Identity, Living with Amyotrophic Lateral  
368 Sclerosis, and Future-Oriented Decisionmaking. *Cambridge Quarterly of Healthcare Ethics*, 29(4), 617-  
369 629.
- 370 Wang TR, Moosa S, Dallapiazza RF, Elias WJ, & Lynch WJ. (2018). *Deep brain stimulation for the  
371 treatment of drug addiction* (45th ed., Vol. 2). Neurosurgery Focus.
- 372 Wexler A & Specker-Sullivan L. (2021). Translational Neuroethics: A Vision for a More Integrated,  
373 Inclusive, and Impactful Field. *AJOB Neuroscience*. doi: 10.1080/21507740.2021.2001078
- 374 Widge AS, Dougherty DD. Managing patients with psychiatric disorders with deep brain stimulation. In:  
375 Marks Jr. WJ, Ostrem JL, editors. *Deep Brain Stimulation Management*. 3rd ed. Cambridge: New York:  
376 Cambridge University Press; 2022. p. 198–214.
- 377 Widge AS, Malone DAJ, Dougherty DD. (2018). Closing the loop on deep brain stimulation for treatment-  
378 resistant depression. *Front Neurosci*, 12:175.

Qualitative Study on DBS for SUDs

379 World Medical Association. (2018). *WMA Declaration of Helsinki – Ethical Principles for Medical*  
380 *Research Involving Human Subjects*. [https://www.wma.net/policies-post/wma-declaration-of-helsinki-](https://www.wma.net/policies-post/wma-declaration-of-helsinki-ethical-principles-for-medical-research-involving-human-subjects/)  
381 [ethical-principles-for-medical-research-involving-human-subjects/](https://www.wma.net/policies-post/wma-declaration-of-helsinki-ethical-principles-for-medical-research-involving-human-subjects/)

Qualitative Study on DBS for SUDs

382  
383  
384  
385

**TABLES**

*Table 1: Participant Demographics*

|                                       | # (%)    |
|---------------------------------------|----------|
| <b>Gender</b>                         |          |
| Male                                  | 11 (55%) |
| Female                                | 9 (45%)  |
| Nonbinary                             | 0 (0%)   |
| <b>Race/Ethnicity*</b>                |          |
| White or Caucasian                    | 10 (50%) |
| Hispanic or Latino                    | 1 (5%)   |
| Black or African American             | 7 (35%)  |
| Asian                                 | 2 (10%)  |
| American Indian/Alaska Native         | 1 (5%)   |
| <b>Age</b>                            |          |
| 25-34                                 | 7 (35%)  |
| 35-44                                 | 8 (40%)  |
| 45-54                                 | 2 (10%)  |
| 55-64                                 | 3 (15%)  |
| Over 65                               | 0 (0%)   |
| <b>Education level</b>                |          |
| Some high school                      | 3 (15%)  |
| Some college                          | 6 (30%)  |
| 2-year college degree                 | 3 (15%)  |
| 4-year college degree                 | 6 (30%)  |
| Graduate-level degree                 | 2 (10%)  |
| <b>Substance*</b>                     |          |
| Alcohol                               | 18 (90%) |
| Cannabis                              | 6 (30%)  |
| Opioids                               | 3 (15%)  |
| Cocaine                               | 3 (15%)  |
| Methamphetamine                       | 3 (15%)  |
| Prescription Pills                    | 2 (10%)  |
| <b>Co-Occurring Disorders*</b>        |          |
| Depression                            | 7 (35%)  |
| Anxiety                               | 5 (25%)  |
| OCD                                   | 2 (10%)  |
| Other (ADD, Diabetes, Panic Disorder) | 3 (15%)  |
| None Disclosed                        | 11 (55%) |
| <b>Prior Treatment</b>                |          |
| None prior                            | 10 (50%) |
| Intensive outpatient (IOP) prior      | 4 (20%)  |
| Inpatient once prior                  | 4 (20%)  |
| Inpatient more than once              | 2 (10%)  |
| <b>Family history</b>                 |          |
| Yes                                   | 17 (85%) |
| No                                    | 3 (15%)  |
| <b>Age of first use</b>               |          |
| <10                                   | 1 (5%)   |
| 10-14                                 | 8 (40%)  |



### Qualitative Study on DBS for SUDs

|       |         |
|-------|---------|
| 15-19 | 8 (40%) |
| >19   | 3 (15%) |

386  
387  
388  
389

\*Respondents could select more than one option; totals may add up to over the number of participants.

Qualitative Study on DBS for SUDs

390 Table 2: Perspectives on Living with a Substance Use Disorder

| SUDs            |                                                                                                                                                                                                                                                                                                                                                                                                                                                                                                                                                                                                                                                                                                                                                                                                                                                                                                                                                                                                                                                                                                                                                                                                                                                                                                                                                                                                                                                                                                                                                                        |
|-----------------|------------------------------------------------------------------------------------------------------------------------------------------------------------------------------------------------------------------------------------------------------------------------------------------------------------------------------------------------------------------------------------------------------------------------------------------------------------------------------------------------------------------------------------------------------------------------------------------------------------------------------------------------------------------------------------------------------------------------------------------------------------------------------------------------------------------------------------------------------------------------------------------------------------------------------------------------------------------------------------------------------------------------------------------------------------------------------------------------------------------------------------------------------------------------------------------------------------------------------------------------------------------------------------------------------------------------------------------------------------------------------------------------------------------------------------------------------------------------------------------------------------------------------------------------------------------------|
| Personal agency | <p>“<b>It’s like a puppet master.</b> Like, “I know I’m moving. I know I’m doing this. Why can’t I stop?” Because <b>something else is controlling me.</b>” (16)</p> <p>“<b>I don’t make the right decisions when I’m drunk.</b> So if I’m drunk all the time, ... <b>I’m just wasting money</b> on things that I’m not supposed to be wasting on... maybe I wouldn’t have dropped out of school because I started drinking and <b>I dropped out of school.</b>” (20)</p>                                                                                                                                                                                                                                                                                                                                                                                                                                                                                                                                                                                                                                                                                                                                                                                                                                                                                                                                                                                                                                                                                              |
| Social dynamics | <p>“I didn’t know how to make friends before I started using so that’s why I sought out drugs... Other than my family, <b>I haven’t really had friendships that didn’t involve drugs.</b>” (3)</p> <p>“My entire step side of the family, <b>I can feel the judgment when I walk into the doors.</b> I mean, they all knew I was a drug addict... People talk about us behind our backs and we know it, and <b>there’s all this judgment that goes on...</b> I’ve said many, many things that I regret, things that made me ashamed of who I was, I’ve broken [their] trust and there’s <b>a lot of things to recover there...</b> So <b>I’ve seen this addiction affect every loved one in my life.</b>” (1)</p> <p>“<b>I shut my whole family out.</b> I just stopped talking to them. I was embarrassed and I didn’t want to be ridiculed. I felt like I didn’t want to explain anything to anybody. I just wanted to drink.” (18)</p>                                                                                                                                                                                                                                                                                                                                                                                                                                                                                                                                                                                                                              |
| Stigma          | <p>“Because of the stigmatism with it, <b>I drank to hide who I actually was, so that I could actually have relationships, because I thought that was the only way I’d be able to have them, if people didn’t know who I was.</b>” (6)</p> <p>“There is such a stigma... I used to work in [a clinical setting]. And when an alcoholic would come in they’d be like, “<b>Oh, put him in the back.</b>” They’re definitely treated differently.” (9)</p> <p>“My [parent] for example, “<b>Why can’t you just quit drinking?</b>” <b>He does not understand addiction. He believes it’s all willpower, stuff like that.</b>” (19)</p> <p>“I feel like I get stereotyped as that typical drunk [ethnicity] guy, at the store buying alcohol first thing in the morning, getting drunk, sitting out all day, just drinking and lazy [ethnicity] stereotype... That actually bugs me because I typically, at least at a minimum put in about a 70 hour work week, easily... I’ve worked very hard at what I do, but <b>I do feel like I get stereotyped as that lazy alcoholic minority.</b>” (10)</p> <p>“I live in wine country. There are people drinking at 10 o’clock in the morning, and nobody says anything. So, <b>once you say you’re an alcoholic, the way people treat you is going to change rather than, ‘I’m a wine aficionado.’</b> And I definitely think living near [city] and stuff, the <b>stigma around like meth, heroin and stuff is a lot greater than alcohol.</b> Even though it’s the same disease just manifested in a different way.” (9)</p> |
| Privacy         | <p>“When you’re going through addiction, <b>you’re hiding almost everything.</b>” (10)</p> <p>“I would say my addiction would keep me more private as in holding, like not saying certain things about myself, or <b>hiding that I went out</b> and got drunk last night.” (9)</p> <p>“<b>I isolated hardcore.</b> Like, most of the people in my life had, and maybe some of them still do. They have no idea.” (6)</p>                                                                                                                                                                                                                                                                                                                                                                                                                                                                                                                                                                                                                                                                                                                                                                                                                                                                                                                                                                                                                                                                                                                                               |

Qualitative Study on DBS for SUDs

|                                     |                                                                                                                                                                                                                                                                                                                                                                                                                                                                                                                                                                                                                                                                                                                                                                                                                                                                                                                                                                                                                    |
|-------------------------------------|--------------------------------------------------------------------------------------------------------------------------------------------------------------------------------------------------------------------------------------------------------------------------------------------------------------------------------------------------------------------------------------------------------------------------------------------------------------------------------------------------------------------------------------------------------------------------------------------------------------------------------------------------------------------------------------------------------------------------------------------------------------------------------------------------------------------------------------------------------------------------------------------------------------------------------------------------------------------------------------------------------------------|
| Interactions with Healthcare System | <p>“So like I said, <b>bad experience at detox</b>, literally went there, came out, drank a whole handle and it just got worse...” (14)</p> <p>“I do believe there is so many beneficial things that the healthcare system does for us that it's just absolutely ignorant to completely distrust them fully. But also it gets to a point where sometimes <b>the opioid pandemic is kind of started by doctors. They continue to prescribe people with these opioids that they actually don't need.</b> I mean, if I get my teeth pulled, give me five Vicodin, and I'm fine. Don't give me 30 of them and then three more refills, which that didn't happen to me, but that's just an example of things that I've seen before.” (2)</p> <p>“In terms of me with my primary care physician, I've moved around a lot for work, so I've bounced different primary care physicians. I never had an ongoing long term therapist... <b>Until I came here, I really haven't dealt with healthcare providers.</b>” (4)</p> |
|-------------------------------------|--------------------------------------------------------------------------------------------------------------------------------------------------------------------------------------------------------------------------------------------------------------------------------------------------------------------------------------------------------------------------------------------------------------------------------------------------------------------------------------------------------------------------------------------------------------------------------------------------------------------------------------------------------------------------------------------------------------------------------------------------------------------------------------------------------------------------------------------------------------------------------------------------------------------------------------------------------------------------------------------------------------------|

391 \*(bolding in tables done for emphasis by authors)

392

393

Qualitative Study on DBS for SUDs

394 Table 3: Perspectives on Substance Use Disorder Treatment

| Treatment                           |                                                                                                                                                                                                                                                                                                                                                                                                                                                                                                                                                                                                                                                                                                                                                                                                                                                                                                                                                                                                                                                                                                  |
|-------------------------------------|--------------------------------------------------------------------------------------------------------------------------------------------------------------------------------------------------------------------------------------------------------------------------------------------------------------------------------------------------------------------------------------------------------------------------------------------------------------------------------------------------------------------------------------------------------------------------------------------------------------------------------------------------------------------------------------------------------------------------------------------------------------------------------------------------------------------------------------------------------------------------------------------------------------------------------------------------------------------------------------------------------------------------------------------------------------------------------------------------|
| Personal agency                     | <p>“<b>There's some dudes up there, they've been in rehab eight times.</b> You can see that they really want to try. It's just life hits you hard, bro. Things happen. You get triggered just like you get... This disease is no joke.” (20)</p> <p>“They always tell you, ‘Depend on your higher power.’ Depend on that power that's higher than yourself, because you can't depend on just you. Because if you could depend on just you to get up out of this, you wouldn't be in this situation of addiction. You wouldn't have the relapses. You wouldn't have the cravings or the urges, if you could just depend on yourself. So <b>apparently we can't just depend on ourselves or rely on ourselves.</b> We need that help.” (12)</p> <p>“A lot of people that have alcoholism, they probably drink most of their money away. And if they're working to stay on their feet, them getting a job, they better put their sobriety first... But bills don't give a damn about that at the end of the day. You know what I'm saying? <b>Bills don't give a f*** about sobriety.</b>” (20)</p> |
| Social Dynamics                     | <p>“So I'm <b>looking forward to mending those relationships sober.</b> I'm looking forward to that. It's not going to be easy cause I did a lot of wrong stuff and I feel really guilty for a lot of the stuff that I did and I'm going to have to make amends for it and apologize and put myself out there. That's the <b>hardest part of recovery...</b> how much you have to put yourself out there so that you can get better, so that you can recover and not drink.” (18)</p>                                                                                                                                                                                                                                                                                                                                                                                                                                                                                                                                                                                                            |
| Stigma                              | <p>“Yeah. I feel like there is. I mean, it's like, “<b>So-and-So's back in treatment again,</b>”” (10)</p> <p>“I think <b>being an inpatient, there's a lot more stigma</b> than if I would have just said, “I'm going to have to go to therapy for my drinking.” Therapy now is kind of what everybody does.” (9)</p>                                                                                                                                                                                                                                                                                                                                                                                                                                                                                                                                                                                                                                                                                                                                                                           |
| Privacy                             | <p>“I know that a <b>big part of being in recovery is to be honest and open</b> about our addiction and stuff, but I know <b>a lot of people that want to be private</b> about them.” (7)</p> <p>“<b>My addiction counselor had mentioned, ‘Tell as many people as you can</b> because the more people that are on board with this, the easier it is because you need your people.’ Because in active use, I isolated so much that I had no one really other than my partner.” (6)</p> <p>“<b>Just my privacy things.</b> I'm super concerned, even, to have any mention of this on my medical record, or anything, just because I work in a large hospital, and I know it's easy to get to other people's medical records, and then give them stuff. <b>I don't want people to think I'm a f***ing opioid addict.</b>” (10)</p>                                                                                                                                                                                                                                                                 |
| Interactions with Healthcare System | <p>“I have to focus on my money. <b>It's my life,</b> as well. What's more important is actually getting my life. I mean, money comes and goes. My life is once. It's once in a lifetime. But it's <b>always a financial aspect,</b> especially when you have to take care of a family or when you're responsible for X amount within a household.” (12)</p> <p>“<b>They give you your antidepressants, you got to come back in six weeks to see if it's working for you and then come back three months later.</b> I mean, anytime you are doing something or taking something that's supposed to continually help you, but there's still risk of side effects, it's absolutely ignorant to not continue to follow up with your healthcare provider.” (1)</p>                                                                                                                                                                                                                                                                                                                                   |

Qualitative Study on DBS for SUDs

|  |                                                                                                                                                                                                                                                                                                                                                                                                                                                          |
|--|----------------------------------------------------------------------------------------------------------------------------------------------------------------------------------------------------------------------------------------------------------------------------------------------------------------------------------------------------------------------------------------------------------------------------------------------------------|
|  | <p>“I mean, in this fast paced American lifestyle that we live in, everybody's working 40 plus hours a week, you got kids, you got sports activities, schooling and all this stuff that, I mean, sometimes I don't go to the dentist just because I don't have time to go to the dentist. It's the <b>fear of going into the healthcare system</b>, but also the <b>inconvenience of trying to fit it into our busy, crazy daily schedules.</b>” (1)</p> |
|--|----------------------------------------------------------------------------------------------------------------------------------------------------------------------------------------------------------------------------------------------------------------------------------------------------------------------------------------------------------------------------------------------------------------------------------------------------------|

395  
396

Qualitative Study on DBS for SUDs

397 Table 4: Perspectives on Deep Brain Stimulation

| DBS                  |                                                                                                                                                                                                                                                                                                                                                                                                                                                                                                                                                                                                                                                                                                                                                                                                                                                                                                                                                                                                                                                                                                                                                                                                                                                                                                                                                                                                                                                                                                                                                                                                                                                                                                                                                                                       |
|----------------------|---------------------------------------------------------------------------------------------------------------------------------------------------------------------------------------------------------------------------------------------------------------------------------------------------------------------------------------------------------------------------------------------------------------------------------------------------------------------------------------------------------------------------------------------------------------------------------------------------------------------------------------------------------------------------------------------------------------------------------------------------------------------------------------------------------------------------------------------------------------------------------------------------------------------------------------------------------------------------------------------------------------------------------------------------------------------------------------------------------------------------------------------------------------------------------------------------------------------------------------------------------------------------------------------------------------------------------------------------------------------------------------------------------------------------------------------------------------------------------------------------------------------------------------------------------------------------------------------------------------------------------------------------------------------------------------------------------------------------------------------------------------------------------------|
| Personal agency      | <p>“Everybody in the AA community knows that <b>you can't do it yourself</b>. And if your higher power, it just happens to be some little magical box that they stuck in your head to help refresh your brain once in a while. I think that would actually be embraced.” (1)</p> <p>“So <b>now I might have an extra leg up</b>. I might have an extra tool in my utility belt, but I still got to go out here and do this kung fu... I'm using it, but what if I have a relapse? What if I have a craving or urge? Oh, guess what? I got the device up in me, so it's going to help me with that craving or that urge. And then, from that, I can go back to my book, and I can go back to my steps, or that I can use another tool, my open line of communication with a sponsor, going to a meeting” (12)</p> <p>“You have to put everything on the table and I think that's the hardest part... I'm hoping that I will make amends. I'm willing and <b>I don't see how that device can do that. You got to kind of, like, make that happen.</b>” (18)</p> <p>“<b>I would be afraid that I would get addicted to using it...</b> one of those videos about what addiction is, it showed the mouse who was pressing the button. He got stimulated, and somehow, I can't remember, it totally overtook everything. So, I just pictured me as a mouse and not drinking, but then not necessarily getting better.” (6)</p> <p>“At this point, I just don't trust my brain to make the right decision at all times. If there's an off chance that I might be able to use it to stimulate it kind of like a drug... <b>I don't want to end up abusing it.</b> My goal is to get into recovery and have it last... <b>I'm just not sure at this point I trust myself quite.</b>” (15)</p> |
| Social relationships | <p>“I would probably wear one of those as a <b>badge of honor</b>, one of those deep brain things just like, “<b>See, I did everything I could.</b>”” (9)</p> <p>“If anything, <b>I'd be happy to show people that I'm willing to do whatever it takes to fix what's going on.</b>” (11)</p> <p>“My [partner] doesn't have very much experience with it [addiction], so they just don't understand. I know <b>they just want the madness to stop</b>. After I finish my phone call with you, I'm going to talk to them about it, and my guess is they would probably applaud me too. Especially if the side effects were minimal, <b>I think they would push me to do it</b> [get DBS].” (10)</p> <p>“Having something visible like if she goes and sees her [parent] and her [parent] sees that and she knows what it's for, could just keep making her angry. Just a <b>reminder that my daughter's a fuck up to her</b>. I don't know. Or there's something wrong with you. But no, there's not. Whatever.” (7)</p> <p>“<b>If it can help me, wow, I mean, could it really improve my life, quality of life and my relationships? Can it help me stay out of the depths of self-pity and depression and not finding things in life fun?</b> I mean, I don't know if it helps with dopamine or anything like that, but can I find things, small things enjoyable or does it always have to be a rush or a high, or something like that?” (15)</p>                                                                                                                                                                                                                                                                                                                                   |
| Stigma               | <p>“Would I want something in my head right now, if everything was considered safe and everything? I think I would pick that as an option. I think I would. Yeah. As long as it had a skinny thingy. I got plenty of hair to cover, but yeah... <b>I don't want to look like Herman</b></p>                                                                                                                                                                                                                                                                                                                                                                                                                                                                                                                                                                                                                                                                                                                                                                                                                                                                                                                                                                                                                                                                                                                                                                                                                                                                                                                                                                                                                                                                                           |

Qualitative Study on DBS for SUDs

|                |                                                                                                                                                                                                                                                                                                                                                                                                                                                                                                                                                                                                                                                                                                                                                                                                                                                                                                                                                                                                                                                                                                                                                                                                                                                                                                                                                                                                                                                                                                                                                                                                                                                                                                                                                                                                                                                                                                                                                                                                                                                                                                                                                                                                                                                                                                                                                                                                                                                                                                                                                                                                                                                                                                                                                                                                                                   |
|----------------|-----------------------------------------------------------------------------------------------------------------------------------------------------------------------------------------------------------------------------------------------------------------------------------------------------------------------------------------------------------------------------------------------------------------------------------------------------------------------------------------------------------------------------------------------------------------------------------------------------------------------------------------------------------------------------------------------------------------------------------------------------------------------------------------------------------------------------------------------------------------------------------------------------------------------------------------------------------------------------------------------------------------------------------------------------------------------------------------------------------------------------------------------------------------------------------------------------------------------------------------------------------------------------------------------------------------------------------------------------------------------------------------------------------------------------------------------------------------------------------------------------------------------------------------------------------------------------------------------------------------------------------------------------------------------------------------------------------------------------------------------------------------------------------------------------------------------------------------------------------------------------------------------------------------------------------------------------------------------------------------------------------------------------------------------------------------------------------------------------------------------------------------------------------------------------------------------------------------------------------------------------------------------------------------------------------------------------------------------------------------------------------------------------------------------------------------------------------------------------------------------------------------------------------------------------------------------------------------------------------------------------------------------------------------------------------------------------------------------------------------------------------------------------------------------------------------------------------|
|                | <p><b>Munster</b> when I go outside” (14)</p> <p>“And then committing to a device like that, might even take that stigma... <b>I almost feel like there is more of a stigma on inpatient treatment than there would be with the external device...</b> Once you attach a medical thing to something, people are like, ‘Well, that’s what my doctor told me to do.’” (10)</p> <p>“There’s <b>so many people nowadays just so against prescriptions and pills...</b>’ I can see some stigmas like, ‘You need to go to the extent of getting a device?’ Well, I feel like that’s where it brings light that yes it is serious enough that technology needs to be involved... <b>I feel like there’d be more stigma against the medication, or more negativity to the medication versus the device,</b> because obviously the device is a much more serious note.” (19)</p>                                                                                                                                                                                                                                                                                                                                                                                                                                                                                                                                                                                                                                                                                                                                                                                                                                                                                                                                                                                                                                                                                                                                                                                                                                                                                                                                                                                                                                                                                                                                                                                                                                                                                                                                                                                                                                                                                                                                                           |
| <p>Privacy</p> | <p>“<b>If I relapsed,</b> it’s my choice to figure out what I need to do. <b>I don’t want anybody like the relapse police running over to my house,</b> “I know you just relapsed,” or somebody calling me on the phone saying, “You just relapsed and you just had a drink and you wasn’t supposed to.”” (14)</p> <p>“It’s like having a service dog or a service animal and they’re like, ‘Well what is this animal for?’ First of all <b>you don’t have to disclose that information but if you feel comfortable enough with someone, you will.</b>” (12)</p> <p>“If I could take care of those cravings, I would’ve preferred not to have to be so open and share so much information about myself... I feel like there’d be, <b>I’d be able to maintain more privacy with the device.</b>” (19)</p> <p>“<b>I wouldn’t want someone to know I have a thingy in my head.</b> Unless it was because they’re part of my team to make sure I’m safe, to make sure it’s helping me out or whatever... I just always <b>want to be able to tell my own story.</b>” (6)</p> <p>“[Law enforcement accessing neural data] That I probably do have an issue with. <b>I have been manipulated by the justice system several times. I have very little trust in them...</b> I have several [relatives] doing life sentences... I have seen how they apply pressure to people that have absolutely nothing to do with it... <b>I’ve never felt a law enforcement officer was there to help me... My trust in law enforcement, the entire system and several officers personally, it’s absolutely zero.</b> I’d have a huge problem with that, actually.” (11)</p> <p>“So <b>it’s kind of like a house arrest bracelet,</b> however you can leave the property and things like that. It just monitors the alcohol intake from your sweat... But I do think that is good because I do need those consequences, otherwise I’m just going to fall right back down the rabbit hole. So <b>if someone is on probation or some sort of anything involving law enforcement, I do believe they should have access to it [neural data]. However, if it’s just me being a free bird, I don’t think they should be able to.</b>” (19)</p> <p>“You don’t want that to be used against you in court or something like that. <b>One of the things people mentioned about George Floyd was his substance abuse and that wasn’t even the major factor.</b> Despite a person having addictions or whatever it may have been the case, it was wrong, the action. So <b>you can’t discriminate for that, but people hear something, then they demonize substances.</b>” (18)</p> <p>“<b>People feel more comfortable seeing a paramedic more than they would be a police officer,</b> because when police show up it’s more of an aggressive factor.” (17)</p> |



Qualitative Study on DBS for SUDs

|                                     |                                                                                                                                                                                                                                                                                                                                                                                                                                                                                                                                                                                                                                                                                                                                                                                                                                                                                                                                                                                                                                                                                                                                                                                                                                                                                                                                                                                                                                                                                                                                                                                                                                                                                                                                                                                                                                                                                                                                                                                                                                                                                                                                                                                                                                                                                                                   |
|-------------------------------------|-------------------------------------------------------------------------------------------------------------------------------------------------------------------------------------------------------------------------------------------------------------------------------------------------------------------------------------------------------------------------------------------------------------------------------------------------------------------------------------------------------------------------------------------------------------------------------------------------------------------------------------------------------------------------------------------------------------------------------------------------------------------------------------------------------------------------------------------------------------------------------------------------------------------------------------------------------------------------------------------------------------------------------------------------------------------------------------------------------------------------------------------------------------------------------------------------------------------------------------------------------------------------------------------------------------------------------------------------------------------------------------------------------------------------------------------------------------------------------------------------------------------------------------------------------------------------------------------------------------------------------------------------------------------------------------------------------------------------------------------------------------------------------------------------------------------------------------------------------------------------------------------------------------------------------------------------------------------------------------------------------------------------------------------------------------------------------------------------------------------------------------------------------------------------------------------------------------------------------------------------------------------------------------------------------------------|
| Interactions with Healthcare System | <p>“Unfortunately, most alcoholics that are out there are middle-class and poor. <b>They're not rich.</b> They don't have a lot of time. Like me, I make okay money, but I got to put in a lot of hours. So like once every two weeks, yeah, I'd agree to it. I'd probably mess around with it, but this is all research, like you said. <b>How long would the thing take?</b> How long would it take?” (20)</p> <p>“For me, things like more <b>logistical things would be of importance.</b> How long is the study? How often do I have to go see a clinician or a doctor or whatever? Where are they located? Especially, I live in [city], so the <b>traffic's pretty bad.</b>” (15)</p> <p>“It's just a thing. Not necessarily good or bad, it's <b>just part of the treatment.</b> I don't know. <b>I already see a therapist regularly,</b> so... I had to meet with the person that does my psych meds like once a month anyways... I don't think there's any medical treatment that I'm aware of where you don't have to check in with the doctor periodically.” (3)</p> <p>“To me, that's [follow-up clinic visits] <b>just part of the maintenance of it.</b> I've only been here a week and they've adjusted my medications three times already... if I personally had it, I could see myself getting irritated without the instant fixing of the cravings I guess. I could see that, but it's not like my [anti-craving medication] NAC, started working immediately.” (19)</p> <p>“I know in the African-American communities, some people would be okay with it. A lot of people wouldn't. <b>It's just bad connotations with medicine.</b> A lot of people would point to Tuskegee but it's many incidents. Where the distrust... But <b>it would be beneficial for people,</b> all colors, all types because some people feel like they're powerless against drugs and certain substances, especially alcohol.” (18)</p> <p>“<b>Money talks, bullshit walks, and this is dealing with the brains.</b> So you're going to have to come out of pocket... it's all about figuring out how to compensate them because putting something in somebody's head and if they have to make out once every two weeks... Most of these people are like me and they got to work. So compensate them.” (20)</p> |
|-------------------------------------|-------------------------------------------------------------------------------------------------------------------------------------------------------------------------------------------------------------------------------------------------------------------------------------------------------------------------------------------------------------------------------------------------------------------------------------------------------------------------------------------------------------------------------------------------------------------------------------------------------------------------------------------------------------------------------------------------------------------------------------------------------------------------------------------------------------------------------------------------------------------------------------------------------------------------------------------------------------------------------------------------------------------------------------------------------------------------------------------------------------------------------------------------------------------------------------------------------------------------------------------------------------------------------------------------------------------------------------------------------------------------------------------------------------------------------------------------------------------------------------------------------------------------------------------------------------------------------------------------------------------------------------------------------------------------------------------------------------------------------------------------------------------------------------------------------------------------------------------------------------------------------------------------------------------------------------------------------------------------------------------------------------------------------------------------------------------------------------------------------------------------------------------------------------------------------------------------------------------------------------------------------------------------------------------------------------------|

398  
399

Qualitative Study on DBS for SUDs

400 *Table 5: Reflections on the importance of patient perspectives for technology development*

| <b>Importance of interviews with people living with SUDs.</b>                                                                                                                                                                                                                                                                                                                                                                                                                                                                                                                                                                                                                                                                                                        |
|----------------------------------------------------------------------------------------------------------------------------------------------------------------------------------------------------------------------------------------------------------------------------------------------------------------------------------------------------------------------------------------------------------------------------------------------------------------------------------------------------------------------------------------------------------------------------------------------------------------------------------------------------------------------------------------------------------------------------------------------------------------------|
| “I mean, no offense to any researchers and doctors, I guess, you probably shouldn't take offense, but a lot of you guys aren't drug addicts and alcoholics. <b>And as much as you can understand about the brain and how these things work, you haven't actually experienced these things.</b> ” (1)                                                                                                                                                                                                                                                                                                                                                                                                                                                                 |
| “If you think that this treatment option is going to be successful for addicts or other people with substance abuse, you should engage them ... To get their feedback on how they would view it, how they may, just to make sure it's actually going to work. <b>Rather than investing in going down this path and then finding that a lot of people would never be open to this type of treatment.</b> ” (4)                                                                                                                                                                                                                                                                                                                                                        |
| “You want to have these conversations. These are the things you really want to do because, <b>the more involved they are in a process like this, the better the outcome will be...</b> You want somebody that can actually A, understand you, B, relate to you, C, help you do it. So these conversations are more than helpful.” (12)                                                                                                                                                                                                                                                                                                                                                                                                                               |
| “I think involving people who are dealing with addiction or have family members who are dealing with addiction, <b>looping them in even when this is just a possibility and not even a current treatment would be very helpful</b> ... With technologies, there's a level of expertise needed to truly understand it. And so, the common man or woman, they either have to have trust from their provider, or they're going to have to build a pretty extensive understanding of it, or some combination of those things to buy in, in my perspective. <b>Knowing the population and their ability to understand neurological treatment, I think the more trust you can build over time, the better. After talking to you, I would feel more comfortable.</b> ” (12) |
| “A lot of people do not understand alcoholism or substance abuse. They just don't. And unless you've been in that you won't know. <b>Even if they say they do from observation, looking on the outside in is not the same as a person that's been going through it physically, mentally, all of that.</b> ” (18)                                                                                                                                                                                                                                                                                                                                                                                                                                                     |
| “ <b>I feel honored to be part of trying to figure this thing out.</b> ” (5)                                                                                                                                                                                                                                                                                                                                                                                                                                                                                                                                                                                                                                                                                         |

401  
402
